# Supplementary material
Source: PubMed Central journal article supplement (PMC4775986)
Supplement: AAC.01763-15_zac003164928so1.pdf [file AAC.01763-15_zac003164928so1.pdf]

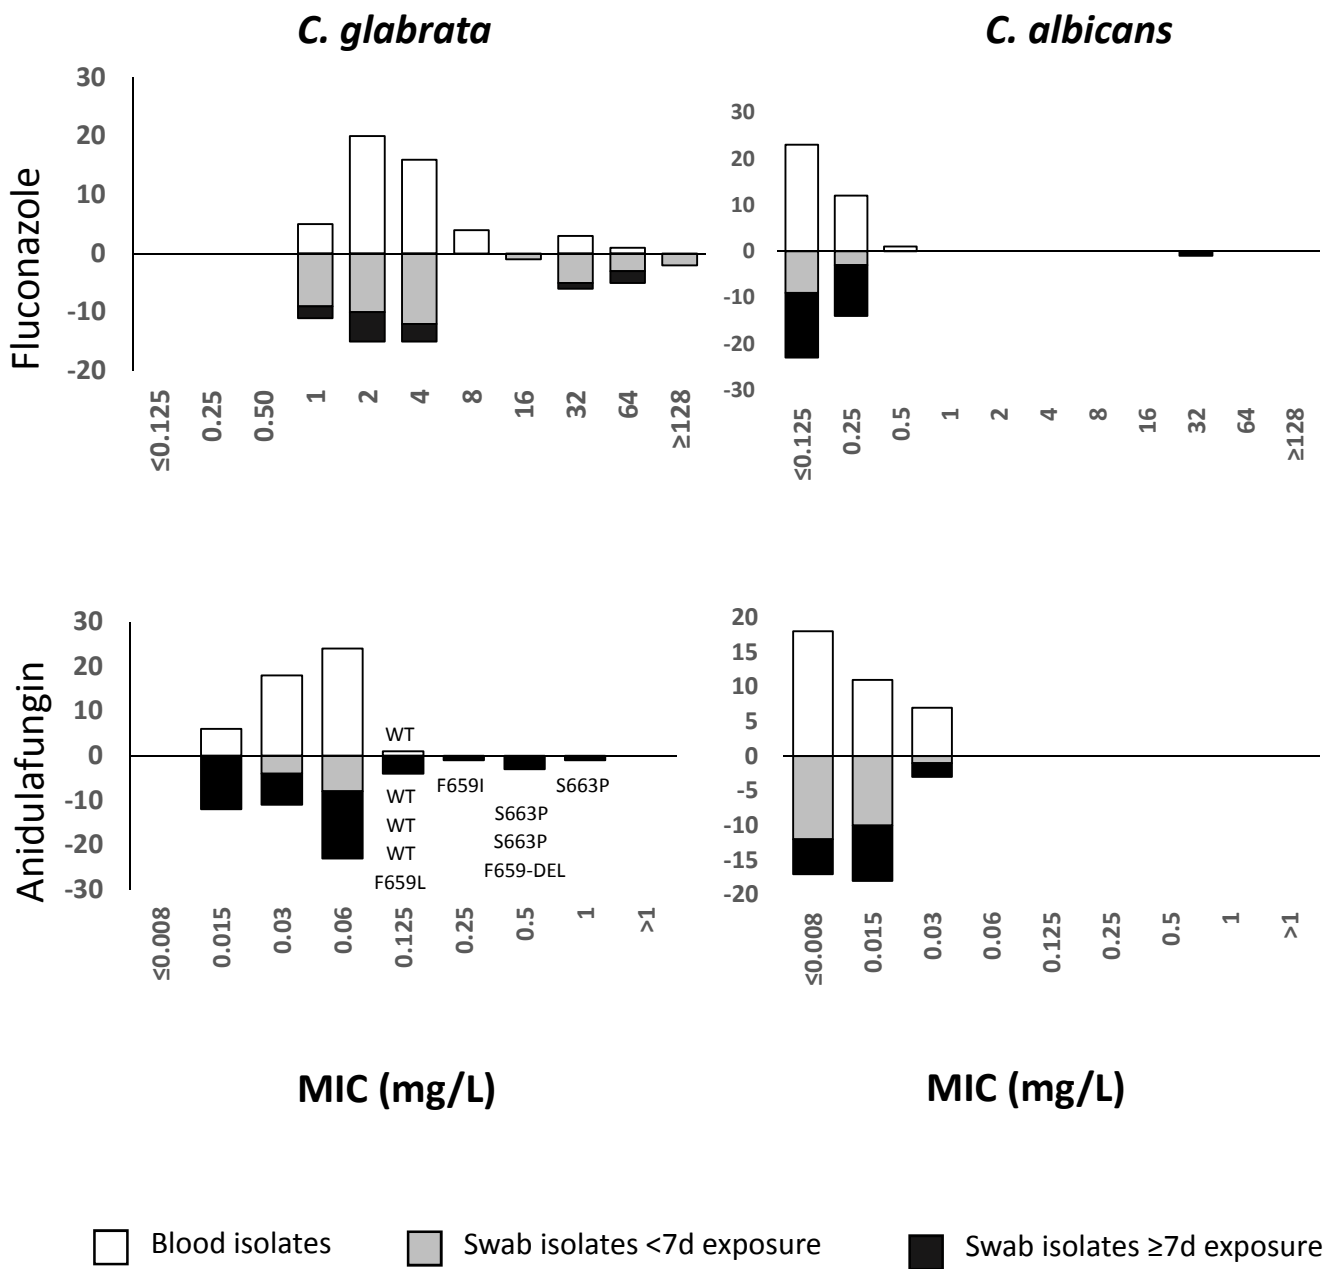

**Figure S1.** MIC distributions of *C. glabrata* (left) and *C. albicans* (right) isolates with  $\geq 5/6$  or  $\geq 6/7$  identical MLST alleles respectively (in mg/L). White bars are blood isolates, grey bars are oral isolates obtained after <7 days exposure to either azoles or echinocandins and black bars are oral isolates obtained after  $\geq 7$  days exposure to either drug class. Each row displays the MIC distributions of fluconazole (top) and anidulafungin (bottom). y-axis indicate number of isolates either from blood (positive) or from oral swabs (negative).

**Supplementary Table S1. MLST overview.** Paired isolates where the same species was found in blood and subsequent oral isolates from the same patient.

| <i>Candida</i> sp.                                                                         | Study ID         | MLST profiles         |                       | EUCAST/E-test MICs (mg/L) |            |            |            | EUCAST/E-test MICs (mg/L) |            |                              |            | Treatment days |           |           |
|--------------------------------------------------------------------------------------------|------------------|-----------------------|-----------------------|---------------------------|------------|------------|------------|---------------------------|------------|------------------------------|------------|----------------|-----------|-----------|
|                                                                                            |                  | Blood                 | Oral                  | Blood                     |            |            |            | Oral                      |            |                              |            | Drug-class     |           |           |
|                                                                                            |                  | [allele no.]          | [allele no.]          | FLU                       | VRC        | ANI        | AMB        | FLU                       | VRC        | ANI                          | AMB        | AZ             | EC        | PO        |
| <b>Resistant oral <i>C. albicans</i> isolates (N=3/45)</b>                                 |                  |                       |                       |                           |            |            |            |                           |            |                              |            |                |           |           |
| <i>C. albicans</i>                                                                         | 168              | 35,4,4,4,4,26,4       | 35,4,14,4,4,26,4      | ≤0.125                    | ≤0.03      | 0.015      | 0.25       | <b>32</b>                 | <b>4</b>   | 0.015                        | 0.5        | 16             | 1         |           |
| <i>C. albicans</i>                                                                         | 76 <sup>M</sup>  | 21,26,14,9,72,102,84  | 21,26,14,9,72,102,84  | ≤0.125                    | ≤0.03      | 0.03       | 0.25       | ≤0.125                    | ≤0.03      | <b>0.03<sup>F641L</sup></b>  | 0.5        |                | 28        |           |
| <i>C. albicans</i>                                                                         | 71 <sup>**</sup> | 43,14,6,4,7,10,8      | 43,14,6,4,7,10,8      | ≤0.125                    | ≤0.03      | 0.03       | 0.5        | ≤0.125                    | ≤0.03      | <b>0.125<sup>D648V</sup></b> | 0.5        |                | 16        |           |
| <b>Blood and oral <i>C. albicans</i> isolates with equivalent susceptibility (N=35/45)</b> |                  |                       |                       | <b>FLU</b>                | <b>VRC</b> | <b>ANI</b> | <b>AMB</b> | <b>FLU</b>                | <b>VRC</b> | <b>ANI</b>                   | <b>AMB</b> | <b>AZ</b>      | <b>EC</b> | <b>PO</b> |
| <i>C. albicans</i>                                                                         | 142              | 21,26,14,9,72,102,84  | 21,26,14,9,72,102,84  | ≤0.125                    | ≤0.03      | 0.015      | 0.25       | 0.25                      | ≤0.03      | ≤0.008                       | 0.25       | 39             |           |           |
| <i>C. albicans</i>                                                                         | 102 <sup>M</sup> | 21,26,14,9,72,102,84  | 21,26,14,9,72,102,84  | ≤0.125                    | ≤0.03      | ≤0.008     | 0.5        | ≤0.125                    | ≤0.03      | 0.015                        | 0.5        | 14             |           |           |
| <i>C. albicans</i>                                                                         | 76 <sup>M</sup>  | 21,26,14,9,72,102,84  | 21,26,14,9,72,102,84  | ≤0.125                    | ≤0.03      | 0.03       | 0.25       | ≤0.125                    | ≤0.03      | ≤0.008                       | 0.25       |                | 28        |           |
| <i>C. albicans</i>                                                                         | 170              | 21,26,14,18,72,102,84 | 21,26,14,18,72,102,84 | ≤0.125                    | ≤0.03      | ≤0.008     | 0.5        | ≤0.125                    | ≤0.03      | ≤0.008                       | 0.5        | 14             | 3         |           |
| <i>C. albicans</i>                                                                         | 75               | 21,26,14,18,72,102,84 | 21,26,14,18,72,102,84 | ≤0.125                    | ≤0.03      | ≤0.008     | 0.25       | ≤0.125                    | ≤0.03      | 0.03                         | 0.5        | 16             |           |           |
| <i>C. albicans</i>                                                                         | 138              | 21,17,21,19,27,83,22  | 21,17,21,19,27,83,22  | ≤0.125                    | ≤0.03      | 0.015      | 0.25       | 0.25                      | ≤0.03      | 0.015                        | 0.5        |                | 13 10     |           |
| <i>C. albicans</i>                                                                         | 57               | 2,2,2,2,2,6,5         | 2,2,2,2,2,6,5         | ≤0.125                    | ≤0.03      | ≤0.008     | 0.5        | ≤0.125                    | ≤0.03      | 0.015                        | 0.5        | 21             | 1         |           |
| <i>C. albicans</i>                                                                         | 169              | 2,2,5,2,2,6,49        | 2,2,5,2,2,6,49        | 0.25                      | ≤0.03      | ≤0.008     | 0.5        | 0.25                      | ≤0.03      | 0.015                        | 0.5        | 14             | 8 8       |           |
| <i>C. albicans</i>                                                                         | 198              | 2,5,5,2,2,6,63        | 2,5,5,2,2,6,63        | 0.25                      | ≤0.03      | ≤0.008     | 0.5        | 0.25                      | ≤0.03      | ≤0.008                       | 0.5        | 14             |           |           |
| <i>C. albicans</i>                                                                         | 116              | 2,2,6,2,2,6,12        | 2,2,6,2,2,20,12       | ≤0.125                    | ≤0.03      | ≤0.008     | 0.25       | 0.25                      | ≤0.03      | 0.03                         | 0.25       |                | 19        |           |
| <i>C. albicans</i>                                                                         | 178              | 4,7,4,4,49,4,4        | 4,4,4,4,49,4,4        | 0.25                      | ≤0.03      | 0.03       | 0.25       | ≤0.125                    | ≤0.03      | 0.015                        | 0.25       | 7              | 5         |           |
| <i>C. albicans</i>                                                                         | 157              | 4,7,4,4,4,24,22       | 4,7,4,4,4,26,22       | ≤0.125                    | ≤0.03      | ≤0.008     | 0.5        | ≤0.125                    | ≤0.03      | 0.015                        | 0.5        | 16             |           |           |
| <i>C. albicans</i>                                                                         | 44               | 4,4,17,4,4,26,20      | 4,4,17,4,4,26,20      | 0.25                      | ≤0.03      | ≤0.008     | 0.25       | 0.25                      | ≤0.03      | ≤0.008                       | 0.25       | 18             |           |           |
| <i>C. albicans</i>                                                                         | 51b*             | 5,3,39,6,43,69,22     | 5,3,39,6,43,69,22     | ≤0.125                    | ≤0.03      | ≤0.008     | 0.25       | ≤0.125                    | ≤0.03      | 0.015                        | 0.125      |                | 22 2      |           |
| <i>C. albicans</i>                                                                         | 51a*             | 5,3,39,6,43,69,22     | 5,3,39,6,43,69,22     | ≤0.125                    | ≤0.03      | ≤0.008     | 0.25       | ≤0.125                    | ≤0.03      | 0.015                        | 0.25       | 7              | 5         |           |
| <i>C. albicans</i>                                                                         | 29               | 3,29,6,146,10,83,22   | 3,29,6,146,10,83,22   | 0.25                      | ≤0.03      | 0.015      | 0.5        | 0.25                      | ≤0.03      | ≤0.008                       | 0.25       | 15             |           |           |
| <i>C. albicans</i>                                                                         | 20               | 35,7,36,4,4,4,20      | 35,7,36,4,4,4,20      | 0.5                       | ≤0.03      | ≤0.008     | 0.25       | 0.25                      | ≤0.03      | ≤0.008                       | 0.25       | 15             |           |           |

|                                                                                                                 |                  |                        |                        |            |            |            |            |            |            |            |            |           |           |           |
|-----------------------------------------------------------------------------------------------------------------|------------------|------------------------|------------------------|------------|------------|------------|------------|------------|------------|------------|------------|-----------|-----------|-----------|
| <i>C. albicans</i>                                                                                              | 134              | 35,4,36,4,4,26,20      | 35,7,36,4,4,26,20      | ≤0.125     | ≤0.03      | 0.03       | 0.5        | ≤0.125     | ≤0.03      | ≤0.008     | 0.5        | 17        | 16        |           |
| <i>C. albicans</i>                                                                                              | 106              | 35,7,17,4,88,26,20     | 35,7,17,4,88,26,20     | ≤0.125     | ≤0.03      | ≤0.008     | 0.25       | ≤0.125     | ≤0.03      | ≤0.008     | 0.5        | 16        |           |           |
| <i>C. albicans</i>                                                                                              | 12               | 35,7,17,4,4,4,20       | 35,7,17,4,4,4,20       | 0.25       | ≤0.03      | 0.015      | 0.25       | 0.25       | ≤0.03      | ≤0.008     | 0.125      | 13        |           |           |
| <i>C. albicans</i>                                                                                              | 45               | 35,7,4,4,34,35,4       | 35,7,4,4,34,35,4       | 0.25       | ≤0.03      | 0.015      | 0.25       | 0.25       | ≤0.03      | 0.015      | 0.25       | 28        | 27        |           |
| <i>C. albicans</i>                                                                                              | 172              | 35,4,4,4,4,4           | 35,4,4,4,4,4           | ≤0.125     | ≤0.03      | 0.03       | 0.5        | ≤0.125     | ≤0.03      | ≤0.008     | 0.5        |           | 19        |           |
| <i>C. albicans</i>                                                                                              | 47               | 13,10,15,6,7,32,15     | 13,10,15,6,7,32,15     | ≤0.125     | ≤0.03      | ≤0.008     | 0.25       | ≤0.125     | ≤0.03      | ≤0.008     | 0.25       | 22        | 3 14      |           |
| <i>C. albicans</i>                                                                                              | 167              | 13,10,15,6,7,37,15     | 13,10,15,6,34,37,15    | 0.25       | ≤0.03      | 0.03       | 0.25       | 0.25       | ≤0.03      | 0.015      | 0.5        |           | NA        |           |
| <i>C. albicans</i>                                                                                              | 95               | 21,8,14,18,102,102,84  | 21,8,14,18,102,102,84  | ≤0.125     | ≤0.03      | ≤0.008     | 0.25       | ≤0.125     | ≤0.03      | 0.015      | 0.5        |           | 12        |           |
| <i>C. albicans</i>                                                                                              | 78               | 21,8,14,18,72,102,84   | 21,8,14,18,72,102,84   | 0.25       | ≤0.03      | 0.015      | 0.25       | 0.25       | ≤0.03      | 0.015      | 0.25       | 12        | 15 6      |           |
| <i>C. albicans</i>                                                                                              | 130              | 23,3,5,3,2,100,165     | 23,3,5,3,2,100,165     | ≤0.125     | ≤0.03      | 0.03       | 0.5        | ≤0.125     | ≤0.03      | ≤0.008     | 0.5        | 10        | 4         |           |
| <i>C. albicans</i>                                                                                              | 41               | 33,14,38,9,78,122,15   | 33,14,38,9,78,122,15   | ≤0.125     | ≤0.03      | ≤0.008     | 0.5        | ≤0.125     | ≤0.03      | ≤0.008     | 0.25       | 14        | 10        |           |
| <i>C. albicans</i>                                                                                              | 66               | 43,14,8,4,34,3,8       | 43,14,8,4,34,3,8       | ≤0.125     | ≤0.03      | 0.015      | 0.25       | ≤0.125     | ≤0.03      | 0.015      | 0.25       |           | NA        |           |
| <i>C. albicans</i>                                                                                              | 193              | 59,3,6,2,80,108,15     | 59,3,6,2,80,108,15     | ≤0.125     | ≤0.03      | 0.015      | 0.25       | ≤0.125     | ≤0.03      | 0.015      | 0.25       | 2         | 11 14     |           |
| <i>C. albicans</i>                                                                                              | 108              | 62,12,21,1,6,4,4       | 62,12,21,1,6,4,4       | ≤0.125     | ≤0.03      | ≤0.008     | 0.25       | ≤0.125     | ≤0.03      | ≤0.008     | 0.5        | 10        | 9         |           |
| <i>C. albicans</i>                                                                                              | 166              | 80,3,6,144,31,45,13    | 80,3,6,144,31,45,13    | 0.25       | ≤0.03      | ≤0.008     | 0.5        | ≤0.125     | ≤0.03      | 0.015      | 0.5        |           | 20        |           |
| <i>C. albicans</i>                                                                                              | 186              | 87,3,6,35,65,157,95    | 87,3,6,35,65,157,95    | ≤0.125     | ≤0.03      | 0.015      | 0.5        | 0.25       | ≤0.03      | ≤0.008     | 0.25       | 14        |           |           |
| <i>C. albicans</i>                                                                                              | 124              | 102,7,6,3,43,164,148   | 102,7,6,3,43,164,148   | 0.25       | ≤0.03      | 0.03       | 0.5        | ≤0.125     | ≤0.03      | 0.015      | 0.5        |           | 7         |           |
| <i>C. albicans</i>                                                                                              | 117              | 153,3,21,145,2,126,207 | 153,3,21,145,2,126,207 | 0.25       | ≤0.03      | 0.015      | 0.25       | 0.25       | ≤0.03      | ≤0.008     | 0.5        | 14        |           |           |
| <b>Unrelated blood and oral <i>C. albicans</i> isolates (N=7/45)</b>                                            |                  |                        |                        | <b>FLU</b> | <b>VRC</b> | <b>ANI</b> | <b>AMB</b> | <b>FLU</b> | <b>VRC</b> | <b>ANI</b> | <b>AMB</b> | <b>AZ</b> | <b>EC</b> | <b>PO</b> |
| <i>C. albicans</i>                                                                                              | 86               | 2,3,2,2,2,24,5         | 2,5,6,2,2,24,20        | ≤0.125     | ≤0.03      | ≤0.008     | 0.5        | ≤0.125     | ≤0.03      | ≤0.008     | 0.5        | 22        |           |           |
| <i>C. albicans</i>                                                                                              | 27               | 36,4,17,4,4,26,20      | 35,4,4,4,195,26,22     | ≤0.125     | ≤0.03      | 0.015      | 0.25       | 0.25       | ≤0.03      | 0.015      | 0.25       | 14        |           |           |
| <i>C. albicans</i>                                                                                              | 100              | 43,14,8,4,7,10,8       | 35,4,65,4,4,4,20       | ≤0.125     | ≤0.03      | 0.015      | 0.25       | 0.25       | ≤0.03      | 0.015      | 0.5        | 20        |           |           |
| <i>C. albicans</i>                                                                                              | 137              | 2,5,5,2,2,6,97         | 40,5,6,2,48,213,49     | ≤0.125     | ≤0.03      | 0.015      | 0.5        | 1          | ≤0.03      | ≤0.008     | 0.25       | 15        |           |           |
| <i>C. albicans</i>                                                                                              | 151*             | 62,3,3,3,3,39,95       | 21,26,14,18,102,102,84 | ≤0.125     | ≤0.03      | 0.015      | 0.25       | ≤0.125     |            | 0.015      | 0.5        | 11        |           |           |
| <i>C. albicans</i>                                                                                              | 102 <sup>M</sup> | 21,26,14,9,72,102,84   | 43,14,6,4,7,10*,8      | ≤0.125     | ≤0.03      | ≤0.008     | 0.5        | ≤0.125     | ≤0.03      | 0.015      | 0.5        | 14        |           |           |
| <i>C. albicans</i>                                                                                              | 53               | 21,26,14,147,76,102,84 | 11,26,6,4,34,60,119    | ≤0.125     | ≤0.03      | ≤0.008     | 0.25       | ≤0.125     | ≤0.03      | 0.015      | 0.25       | 17        | 3         |           |
| <b>Resistant <i>C. glabrata</i> oral isolates (N=18/56)<br/>(or &gt;2 2-fold MIC dilution steps difference)</b> |                  |                        |                        | <b>FLU</b> | <b>VRC</b> | <b>ANI</b> | <b>AMB</b> | <b>FLU</b> | <b>VRC</b> | <b>ANI</b> | <b>AMB</b> | <b>AZ</b> | <b>EC</b> | <b>PO</b> |

|                                                                                            |                  |                  |                  |            |            |                           |            |             |            |                               |            |           |           |           |
|--------------------------------------------------------------------------------------------|------------------|------------------|------------------|------------|------------|---------------------------|------------|-------------|------------|-------------------------------|------------|-----------|-----------|-----------|
| <i>C. glabrata</i>                                                                         | 112 <sup>M</sup> | 2,5,35,5,1,2     | 2,5,35,5,1,2     | <b>64</b>  | 0.5        | 0.06                      | 0.5        | 1           | ≤0.03      | 0.06                          | 2          | 20        | 2         |           |
| <i>C. glabrata</i>                                                                         | 112 <sup>M</sup> | 2,5,35,5,1,2     | 2,5,35,5,1,2     | <b>64</b>  | 0.5        | 0.06                      | 0.5        | <b>≥128</b> | 2          | 0.03                          | 1          | 20        | 2         |           |
| <i>C. glabrata</i>                                                                         | 153              | 5,7,8,7,3,6      | 5,7,8,7,3,6      | 2          | ≤0.03      | 0.03                      | 0.5        | <b>64</b>   | 2          | 0.06                          | 0.5        | 2         | 20        |           |
| <i>C. glabrata</i>                                                                         | 80               | 6,6,5,2,3,4      | 6,6,5,2,3,4      | 1          | ≤0.03      | 0.06                      | 1          | <b>64</b>   | 0.5        | 0.06                          | 0.5        | 7         | 7         |           |
| <i>C. glabrata</i>                                                                         | 43               | 12,4,16,5,1,8    | 12,4,16,5,1,8    | 2          | ≤0.03      | 0.03                      | 0.06       | <b>64</b>   | 1          | 0.06                          | 0.06       | 18        |           |           |
| <i>C. glabrata</i>                                                                         | 122 <sup>M</sup> | 19,20,38,NA,17,2 | 19,20,38,NA,17,2 | 2          | ≤0.03      | 0.03                      | 0.5        | <b>≥128</b> | 2          | 0.06                          | 0.25       |           | 14        |           |
| <i>C. glabrata</i>                                                                         | 184              | 3,4,4,3,3,4      | 3,4,4,3,3,4      | 4          | 0.125      | <b>0.125<sup>WT</sup></b> | 0.25       | 4           | 0.125      | 0.06                          | 0.125      | 20        |           |           |
| <i>C. glabrata</i>                                                                         | 18 <sup>M</sup>  | 2,5,7,5,1,2      | 2,5,7,5,1,2      | 4          | 0.06       | 0.06                      | 0.5        | 1           | ≤0.03      | <b>0.125<sup>WT</sup></b>     | 4          | 4         | 19        |           |
| <i>C. glabrata</i>                                                                         | 40               | 3,6,22,2,3,9     | 3,6,22,2,3,9     | 4          | 0.06       | 0.06                      | 0.5        | 1           | ≤0.03      | <b>0.125<sup>WT</sup></b>     | 1          | 3         | 40        | 7         |
| <i>C. glabrata</i>                                                                         | 58               | 5,7,8,7,3,6      | 5,7,8,7,3,6      | 2          | ≤0.03      | 0.06                      | 1          | 1           | ≤0.03      | <b>0.125<sup>F659L</sup></b>  | 1          | 14        | 6         |           |
| <i>C. glabrata</i>                                                                         | 15               | 2,5,7,5,1,2      | 2,5,7,5,1,2      | 8          | 0.125      | 0.06                      | 1          | 4           | 0.125      | <b>0.125<sup>WT</sup></b>     | 1          | 20        |           |           |
| <i>C. glabrata</i>                                                                         | 35               | 7,5,6,12,1,8     | 7,5,6,12,1,8     | 32         | 0.5        | 0.06                      | 0.5        | <b>64</b>   | 0.5        | <b>0.25<sup>F659I</sup></b>   | 1          | 14        |           |           |
| <i>C. glabrata</i>                                                                         | 51b*             | 7,4,3,4,1,3      | 7,4,3,4,1,3      | 2          | ≤0.03      | 0.03                      | 0.5        | 4           | 0.06       | <b>0.5<sup>S663P</sup></b>    | 0.5        | 22        | 2         |           |
| <i>C. glabrata</i>                                                                         | 143 <sup>M</sup> | 6,6,5,2,3,4      | 6,6,5,2,3,4      | 1          | ≤0.03      | 0.015                     | 1          | 32          | 0.25       | <b>0.5<sup>F659-DEL</sup></b> | 0.5        | 10        |           |           |
| <i>C. glabrata</i>                                                                         | 180              | 5,7,8,7,3,6      | 5,7,8,7,3,6      | 32         | 1          | 0.03                      | 1          | <b>64</b>   | 2          | <b>0.5<sup>S663P</sup></b>    | 0.5        | 21        |           |           |
| <i>C. glabrata</i>                                                                         | 161 <sup>M</sup> | 5,7,8,7,3,6      | 5,7,8,7,3,6      | 32         | 1          | 0.015                     | 0.5        | 32          | 1          | <b>1<sup>S663P</sup></b>      | 1          | 20        |           |           |
| <i>C. glabrata</i>                                                                         | 104              | 3,4,4,3,3,4      | 3,4,4,3,3,4      | 2          | ≤0.03      | 0.06                      | 1          | <b>32</b>   | 1          | 0.06                          | 0.5        | 4         | 11        |           |
| <i>C. glabrata</i>                                                                         | 99               | 9,19,10,4,3,2    | 9,19,10,4,3,2    | 2          | ≤0.03      | 0.015                     |            | <b>32</b>   | 0.5        | 0.03                          | 0.5        | 12        |           |           |
| <b>Blood and oral <i>C. glabrata</i> isolates with equivalent susceptibility (N=37/56)</b> |                  |                  |                  | <b>FLU</b> | <b>VRC</b> | <b>ANI</b>                | <b>AMB</b> | <b>FLU</b>  | <b>VRC</b> | <b>ANI</b>                    | <b>AMB</b> | <b>AZ</b> | <b>EC</b> | <b>PO</b> |
| <i>C. glabrata</i>                                                                         | 2                | 1,2,2,1,2,1      | 1,2,2,1,2,1      | 4          | 0.125      | 0.03                      | 0.5        | 2           | 0.06       | 0.015                         | 0.5        | 12        |           |           |
| <i>C. glabrata</i>                                                                         | 49               | 1,2,2,1,2,1      | 1,2,2,1,2,1      | 2          | ≤0.03      | 0.06                      | 0.25       | 2           | ≤0.03      | 0.015                         | 0.25       | 14        |           |           |
| <i>C. glabrata</i>                                                                         | 145              | 1,2,2,1,1,1      | 1,2,2,1,1,1      | 4          | 0.06       | 0.03                      | 1          | 4           | 0.125      | 0.015                         | 0.5        | 5         | 56        |           |
| <i>C. glabrata</i>                                                                         | 136              | 2,5,35,5,1,2     | 2,5,35,5,1,2     | 1          | ≤0.03      | 0.06                      | 1          | 1           | ≤0.03      | 0.015                         | 0.5        | 15        |           |           |
| <i>C. glabrata</i>                                                                         | 39               | 2,5,7,5,1,2      | 2,5,7,5,1,2      | 2          | 0.06       | 0.06                      | 1          | 2           | ≤0.03      | 0.03                          | 0.5        | 8         | 25        |           |
| <i>C. glabrata</i>                                                                         | 98               | 2,5,7,5,1,2      | 2,5,7,5,1,2      | 4          | 0.06       | 0.06                      | 1          | 2           | ≤0.03      | 0.06                          | 1          | 18        |           |           |
| <i>C. glabrata</i>                                                                         | 181              | 2,5,7,5,1,2      | 2,5,7,5,1,2      | 4          | 0.125      | 0.06                      | 1          | 4           | 0.125      | 0.06                          | 0.5        | 13        |           |           |
| <i>C. glabrata</i>                                                                         | 63               | 2,5,7,5,1,2      | 2,5,7,5,1,2      | 2          | 0.06       | 0.03                      | 1          | 2           | 0.06       | 0.06                          | 1          | 7         | 3         |           |
| <i>C. glabrata</i>                                                                         | 18 <sup>M</sup>  | 2,5,7,5,1,2      | 2,5,7,5,1,2      | 4          | 0.06       | 0.06                      | 0.5        | 16          | 0.25       | 0.03                          | 0.25       | 4         | 19        |           |

|                    |                  |                  |                  |    |       |       |      |    |       |       |      |       |
|--------------------|------------------|------------------|------------------|----|-------|-------|------|----|-------|-------|------|-------|
| <i>C. glabrata</i> | 182              | 2,5,35,5,1,2     | 2,5,35,5,1,2     | 4  | 0.06  | 0.03  | 0.25 | 4  | 0.125 | 0.03  | 0.5  | 12    |
| <i>C. glabrata</i> | 94               | 3,4,1,3,3,21     | 3,4,1,3,3,21     | 2  | ≤0.03 | 0.06  | 1    | 2  | 0.06  | 0.015 | 1    | 16    |
| <i>C. glabrata</i> | 146              | 3,4,4,3,3,4      | 3,4,4,3,3,4      | 2  | 0.06  | 0.03  | 1    | 2  | 0.06  | 0.03  | 1    | 14 26 |
| <i>C. glabrata</i> | 96               | 3,9,26,4,15,4    | 3,9,26,4,15,4    | 2  | 0.06  | 0.03  | NA   | 1  | ≤0.03 | 0.015 | 0.5  | 26    |
| <i>C. glabrata</i> | 161 <sup>M</sup> | 5,7,8,7,3,6      | 5,7,8,7,3,6      | 32 | 1     | 0.015 | 0.5  | 32 | 1     | 0.015 | 1    | 20    |
| <i>C. glabrata</i> | 110              | 5,7,8,7,3,6      | 5,7,8,7,3,6      | 2  | ≤0.03 | 0.03  | 1    | 2  | ≤0.03 | 0.03  | 1    | 8     |
| <i>C. glabrata</i> | 23               | 5,7,8,7,3,6      | 5,7,8,7,3,6      | 4  | 0.06  | 0.06  | 1    | 2  | ≤0.03 | 0.06  | 1    | 14    |
| <i>C. glabrata</i> | 154              | 5,7,8,7,3,6      | 5,7,8,7,3,6      | 4  | 0.125 | 0.015 | 0.5  | 2  | 0.06  | 0.06  | 1    | 28    |
| <i>C. glabrata</i> | 177              | 5,7,8,7,3,6      | 5,7,8,7,3,6      | 4  | 0.125 | 0.06  | 1    | 4  | 0.125 | 0.06  | 0.5  | 10    |
| <i>C. glabrata</i> | 10               | 5,7,8,7,3,6      | 5,7,8,7,3,6      | 4  | 0.06  | 0.03  | 1    | 4  | 0.125 | 0.03  | 0.5  | 18    |
| <i>C. glabrata</i> | 151 <sup>*</sup> | 5,7,8,7,3,6      | 5,7,8,7,3,6      | 4  | 0.06  | 0.06  | 1    | 4  | 0.06  | 0.06  | 1    | 11    |
| <i>C. glabrata</i> | 158              | 6,6,5,2,3,4      | 6,6,5,2,3,4      | 1  | ≤0.03 | 0.03  | 0.5  | 2  | 0.06  | 0.06  | 0.5  | 12    |
| <i>C. glabrata</i> | 143 <sup>M</sup> | 6,6,5,2,3,4      | 6,6,5,2,3,4      | 1  | ≤0.03 | 0.015 | 1    | 1  | ≤0.03 | 0.015 | 0.5  | 10    |
| <i>C. glabrata</i> | 143 <sup>M</sup> | 6,6,5,2,3,4      | 6,6,5,2,3,4      | 1  | ≤0.03 | 0.015 | 1    | 4  | 0.125 | 0.015 | 0.5  | 10    |
| <i>C. glabrata</i> | 28               | 6,6,5,2,3,22     | 6,6,5,2,3,22     | 2  | ≤0.03 | 0.03  | 1    | 1  | ≤0.03 | 0.06  | 0.5  | 17    |
| <i>C. glabrata</i> | 51a <sup>*</sup> | 7,4,3,4,1,3      | 7,4,3,4,1,3      | 2  | ≤0.03 | 0.06  | 1    | 4  | 0.125 | 0.06  | 0.5  | 7 5   |
| <i>C. glabrata</i> | 125              | 7,5,6,12,1,8     | 7,5,6,12,1,8     | 2  | 0.06  | 0.03  | 1    | 1  | 0.06  | 0.06  | 1    | 7     |
| <i>C. glabrata</i> | 6                | 7,5,6,12,1,8     | 7,5,6,12,1,8     | 2  | ≤0.03 | 0.06  | 0.5  | 2  | 0.06  | 0.03  | 1    | 13 3  |
| <i>C. glabrata</i> | 56               | 7,5,6,12,1,8     | 7,5,6,12,1,8     | 1  | ≤0.03 | 0.015 | 0.5  | 1  | 0.06  | 0.015 | 1    | 25 8  |
| <i>C. glabrata</i> | 8                | 7,5,37,12,1,8    | 7,5,37,12,1,8    | 8  | 0.125 | 0.015 | 1    | 1  | 0.06  | 0.015 | 0.25 | 15    |
| <i>C. glabrata</i> | 174              | 8,4,3,5,1,2      | 8,4,3,5,1,2      | 4  | 0.125 | 0.06  | 0.5  | 4  | 0.06  | 0.06  | 0.5  | 12    |
| <i>C. glabrata</i> | 71 <sup>*</sup>  | 8,4,3,5,1,2      | 8,4,3,5,1,2      | 2  | ≤0.03 | 0.06  | 1    | 4  | 0.125 | 0.06  | 0.5  | 16    |
| <i>C. glabrata</i> | 191              | 8,5,13,9,3,1     | 8,5,13,9,3,1     | 4  | 0.06  | 0.06  | 1    | 4  | 0.06  | 0.03  | 0.25 | 5 12  |
| <i>C. glabrata</i> | 9                | 9,9,10,4,3,2     | 9,9,10,4,3,2     | 8  | 0.125 | 0.03  | 0.5  | 2  | ≤0.03 | 0.015 | 0.25 | 18 13 |
| <i>C. glabrata</i> | 176              | 12,4,16,5,1,8    | 12,4,16,5,1,8    | 4  | 0.06  | 0.06  | 1    | 2  | 0.06  | 0.06  | 0.5  | 2 15  |
| <i>C. glabrata</i> | 192              | 16,9,36,13,14,4  | 16,9,36,13,14,4  | 8  | 0.25  | 0.06  | 0.5  | 32 | 1     | 0.06  | 0.5  | 5 15  |
| <i>C. glabrata</i> | 122 <sup>M</sup> | 19,20,38,NA,17,2 | 19,20,38,NA,17,2 | 2  | ≤0.03 | 0.03  | 0.5  | 4  | 0.06  | 0.03  | 0.25 | 14    |
| <i>C. glabrata</i> | 54               | 26,2,2,1,1,1     | 26,2,2,1,1,1     | 2  | ≤0.03 | 0.03  | 0.5  | 2  | 0.06  | 0.06  | 0.5  | 3 19  |

| Unrelated blood and oral <i>C. glabrata</i> isolates (N=1/56) |     |                |                | FLU    | VRC   | ANI                          | AMB  | FLU            | VRC          | ANI                          | AMB  | AZ | EC | PO |
|---------------------------------------------------------------|-----|----------------|----------------|--------|-------|------------------------------|------|----------------|--------------|------------------------------|------|----|----|----|
| <i>C. glabrata</i>                                            | 131 | 5,7,8,7,3,6    | 2,5,35,5,1,2   | 2      | 0.06  | 0.03                         | 1    | 1              | ≤0.03        | 0.015                        | 0.5  |    |    | 18 |
| Other <i>Candida</i> species (N=11)                           |     |                |                | FLU    | VRC   | ANI                          | AMB  | FLU            | VRC          | ANI                          | AMB  | AZ | EC | PO |
| <i>C. dubliniensis</i>                                        | 25  | 1,1,1,1,1,1,1  | 1,1,1,1,1,1,1  | 1      | ≤0.03 | 0.015                        | 0.03 | 0.5            | ≤0.03        | 0.015                        | 0.03 |    |    | 22 |
| <i>C. tropicalis</i>                                          | 109 | 1,58,4,3,48,1  | 1,58,4,3,4,3   | 0.5    | ≤0.03 | 0.03                         | 1    | 2              | ≤0.03        | ≤0.008                       | 0.5  |    |    | 30 |
| <i>C. tropicalis</i>                                          | 195 | 3,7,4,10,1,1   | 3,7,4,10,4,6   | ≤0.125 | ≤0.03 | 0.03                         | 0.5  | 0.25           | ≤0.03        | 0.03                         | 0.25 |    |    | 14 |
| <i>C. tropicalis</i>                                          | 96  | 1,100,4,3,22,1 | 1,100,4,3,48,1 | 0.25   | 0.06  | 0.03                         | 0.5  | <b>≥128***</b> | <b>&gt;4</b> | 0.03                         | 0.5  |    |    | 26 |
| <i>C. parapsilosis</i>                                        | 107 | MLVA-type DK-1 | MLVA-type DK-1 | 0.5    | ≤0.03 | 1                            | 0.25 | <b>8</b>       | 0.125        | >1                           | 0.5  |    |    | 17 |
| <i>C. krusei</i>                                              | 65  | 4,1,32,4,4,2   | 4,1,32,4,4,28  | 16     | 0.125 | <b>0.125<sup>L701M</sup></b> | 1    | 128            | 1            | <b>0.125<sup>L701M</sup></b> | 1    | 14 |    | 13 |
| <i>C. krusei</i>                                              | 163 | 4,27,11,5,2,2  | 4,27,11,5,2,2  | 32     | 0.5   | <b>0.125<sup>L701M</sup></b> | 1.5  | 32             | 0.25         | <b>0.125<sup>L701M</sup></b> | 1    |    | 14 |    |
| <i>C. krusei</i>                                              | 103 | 4,3,32,19,5,11 | 4,3,32,19,5,11 | ≥128   | 2     | 0.03                         | 0.5  | ≥128           | 2            | 0.06                         | 0.25 | 8  |    | 6  |
| <i>C. krusei</i>                                              | 133 | 3,11,39,5,3,30 | 3,11,39,5,3,30 | 16     | 0.125 | 0.015                        | 0.5  | 16             | 0.125        | 0.03                         | 0.5  | 12 | 15 |    |
| <i>S. cerevisiae</i>                                          | 79  | 1,1,1,4,4,1    | 3,2,1,3,5,1    | 16     | 0.5   | 0.25                         | 0.5  | 8              | 0.125        | 0.06                         | 0.5  | 12 | 16 |    |
| <i>S. cerevisiae</i>                                          | 1   | 2,2,2,3,3,1    | 2,2,2,3,3,1    | 16     | 0.25  | 0.06                         | 0.25 | 16             | 0.25         | 0.06                         | 0.5  |    |    | 7  |

AZ: azole (primarily fluconazole), EC: echinocandin (primarily caspofungin), PO: polyene. NA: not applicable. MLVA: Multiple-Locus Variable number of tandem repeats Analysis. Red numbers indicate different alleles when comparing blood and swab isolates. MIC values above EUCAST breakpoints for resistance are bold and underlined. MIC values elevated >2 2-fold MIC dilutions are bold. Fks profiles are provided as superscript for isolates with anidulafungin MICs above EUCAST breakpoints.

\*Patient carried both *C. albicans* and *C. glabrata* in blood and oral swab.

\*\*This patient had two separate *C. glabrata* candidemia cases and in both cases *C. albicans* was found in oral swabs. The second oral isolate was echinocandin resistant.

\*\*\*Trailing, 50% growth inhibition in entire concentration range.

<sup>M</sup>Multiple unique isolates found in oral and paired with initial blood isolate.

Number of *C. albicans* pairs with similar MLST profiles (≥6/7 identical alleles) = 38/45 (84.4%)

Number of *C. glabrata* pairs with similar MLST profiles (≥5/6 identical alleles) = 54/55 (98.2%)

Number of other *Candida* species with similar MLST profiles (≥5/6 identical alleles) = 8/11 (72.7%).

Similar genotype overall: 101 of 112 isolates = 90.2%
